# Supplementary material
Source: PubMed Central journal article supplement (PMC3249980)

# Figure S1

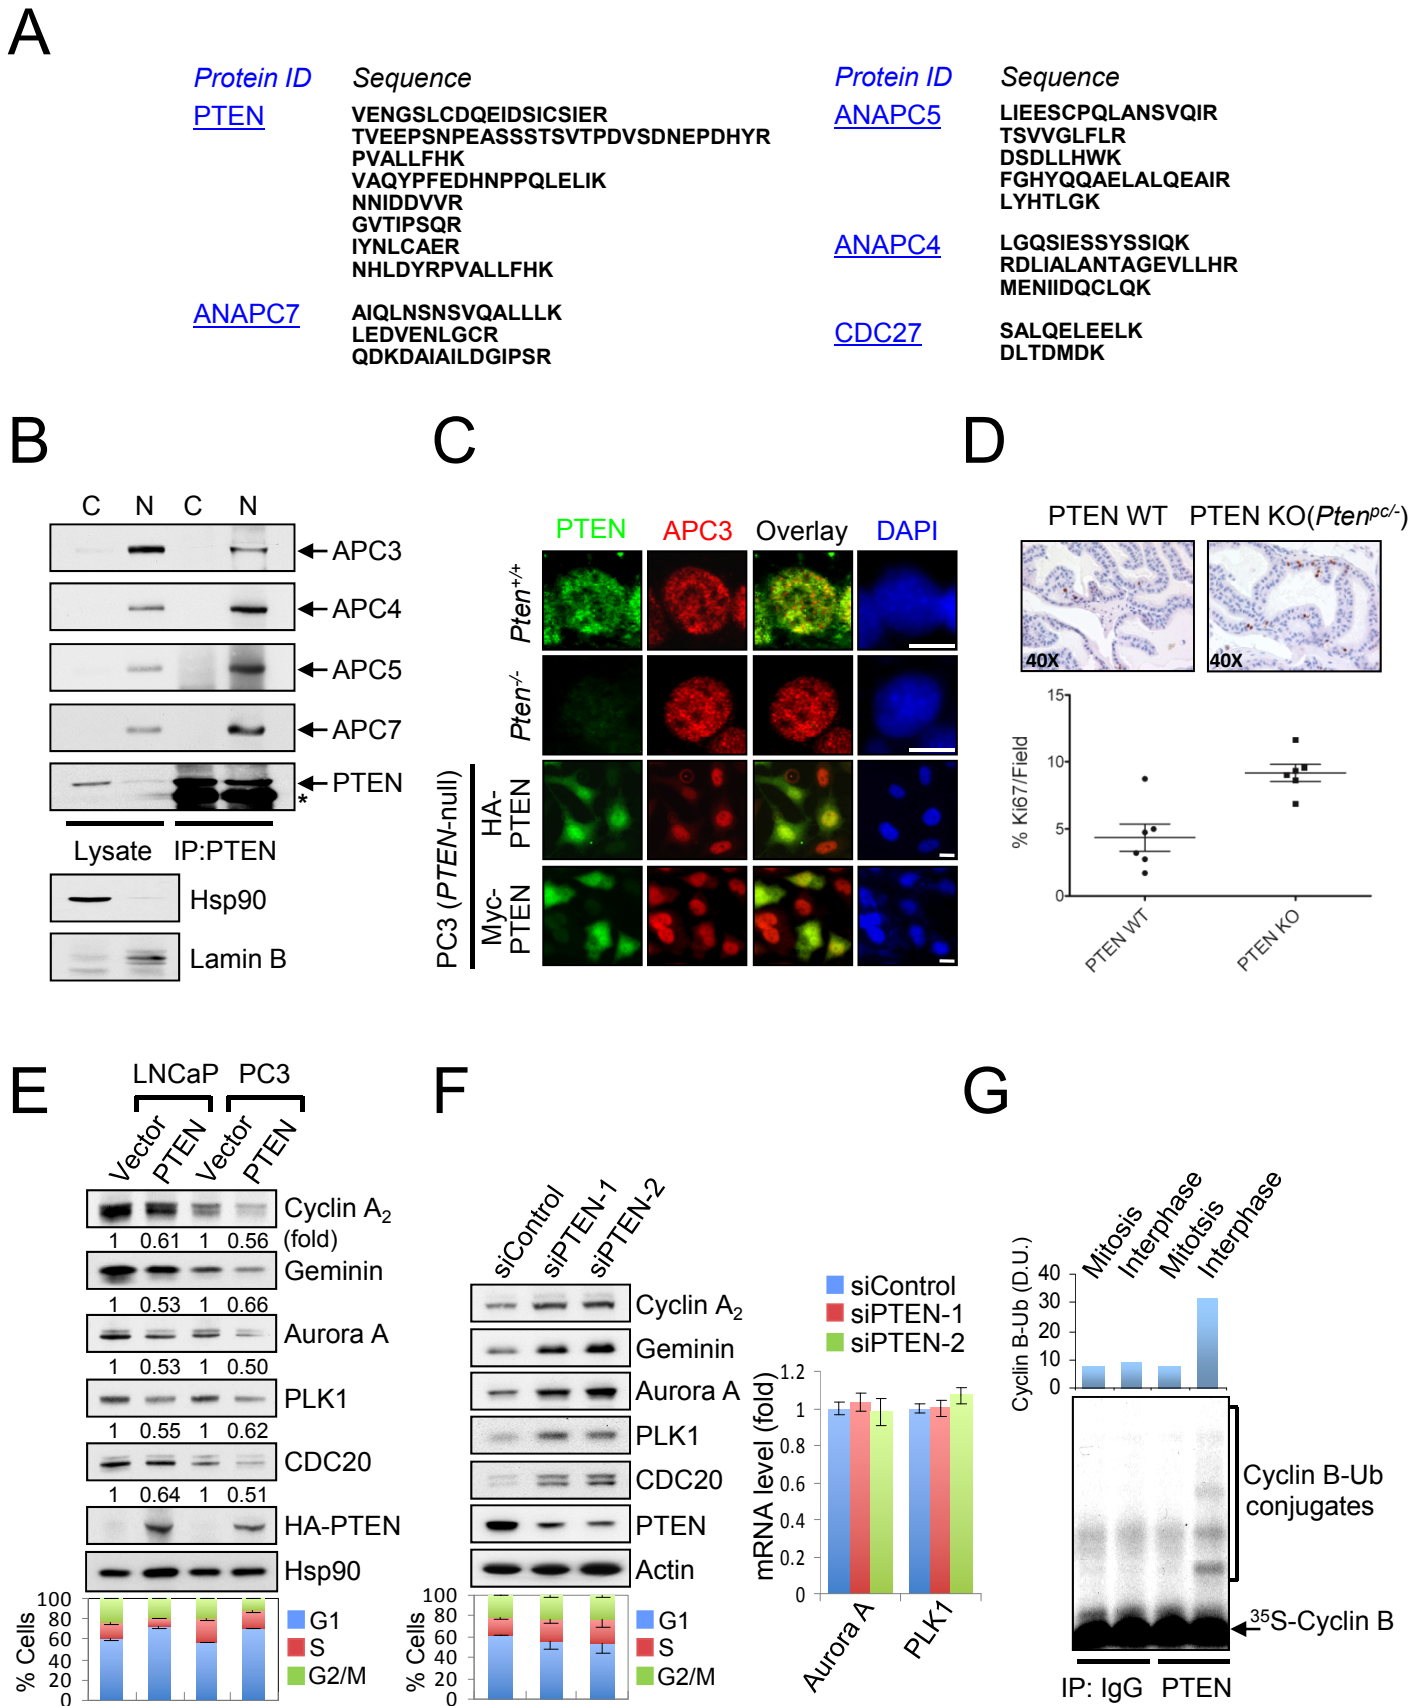

# Figure S2

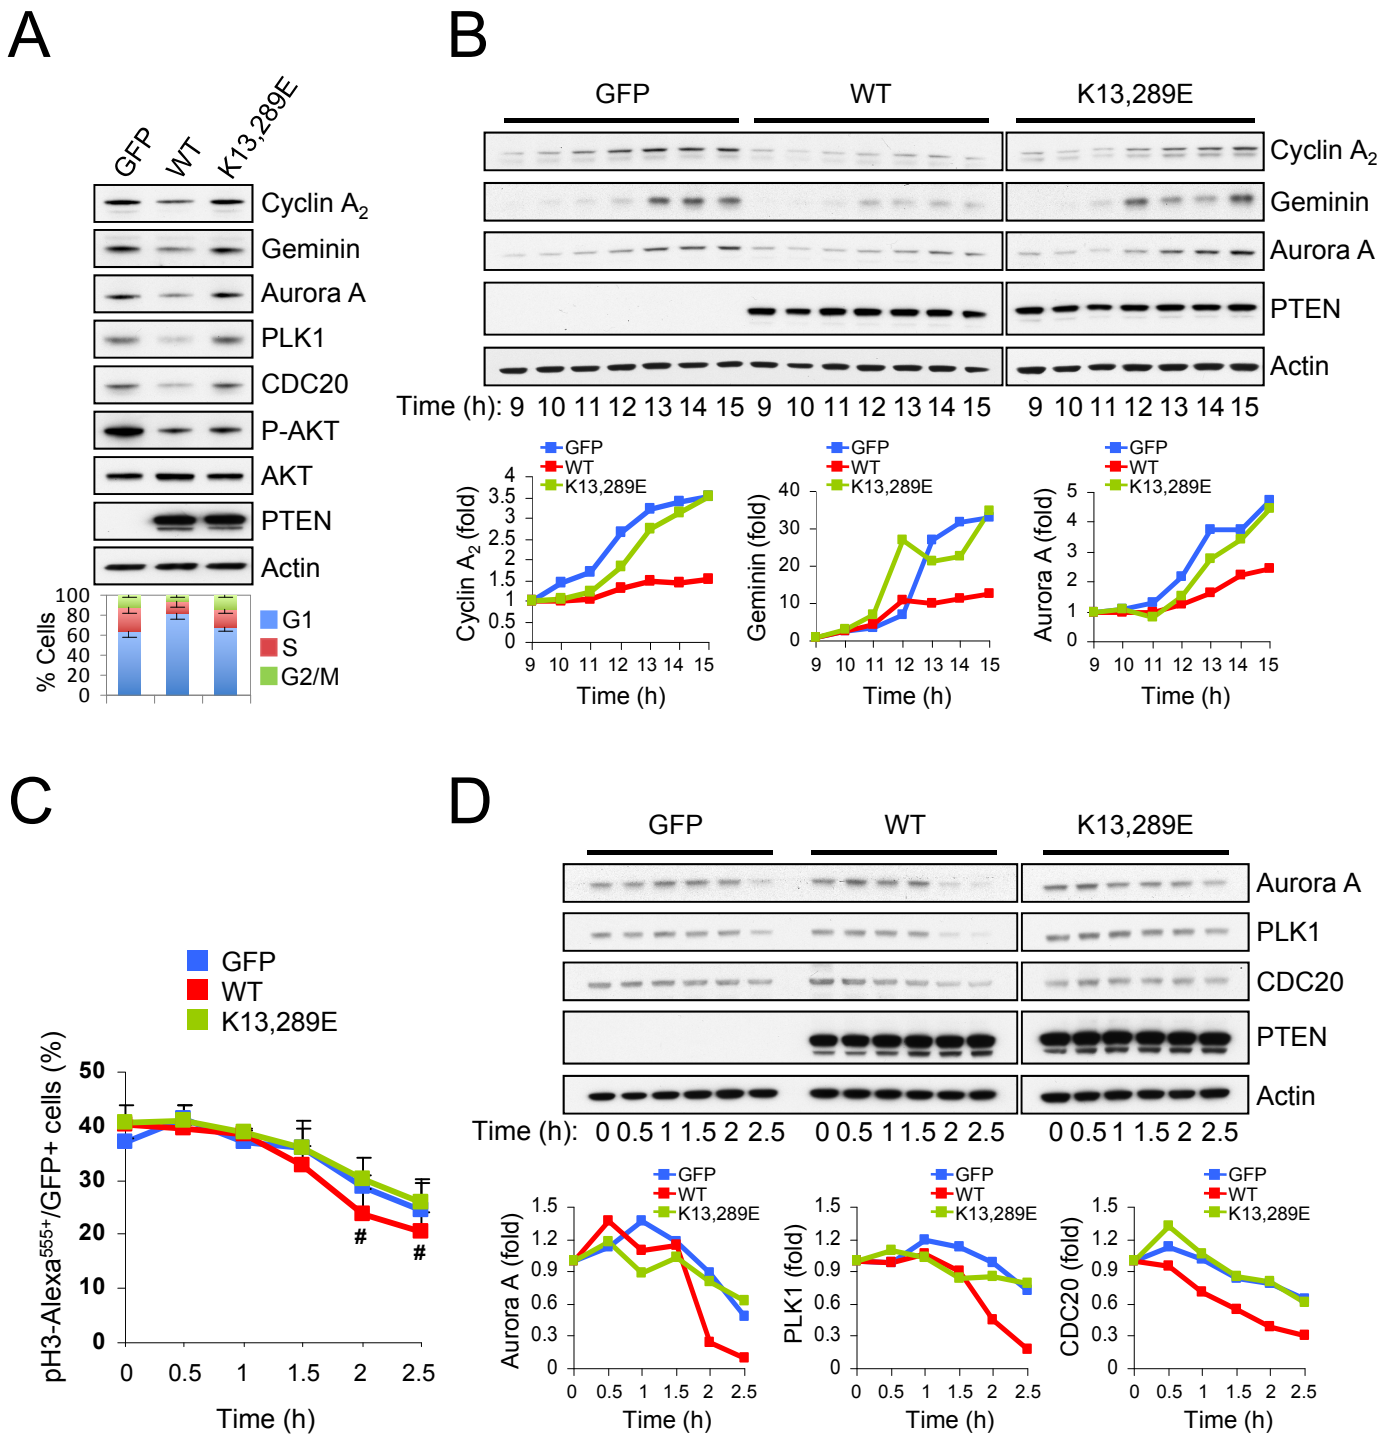

Figure S3

A

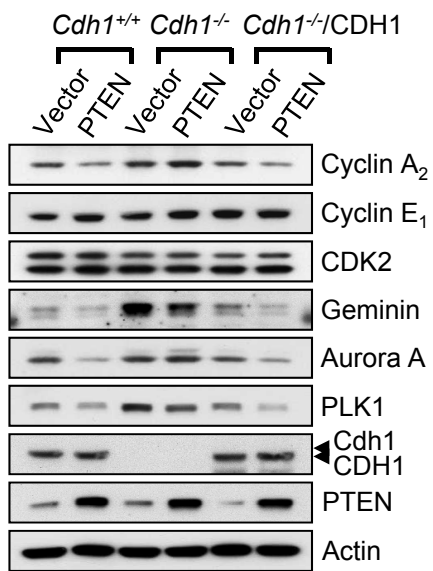

B

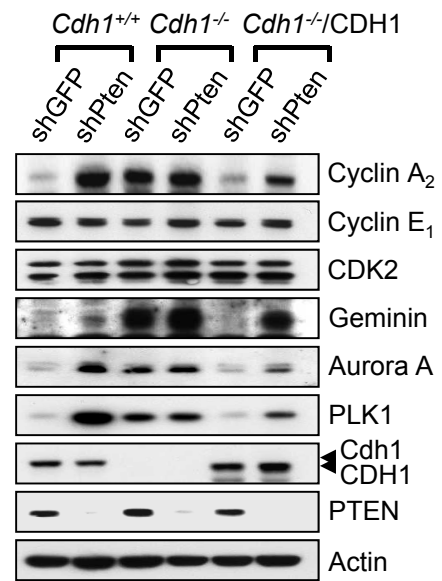

# Figure S4

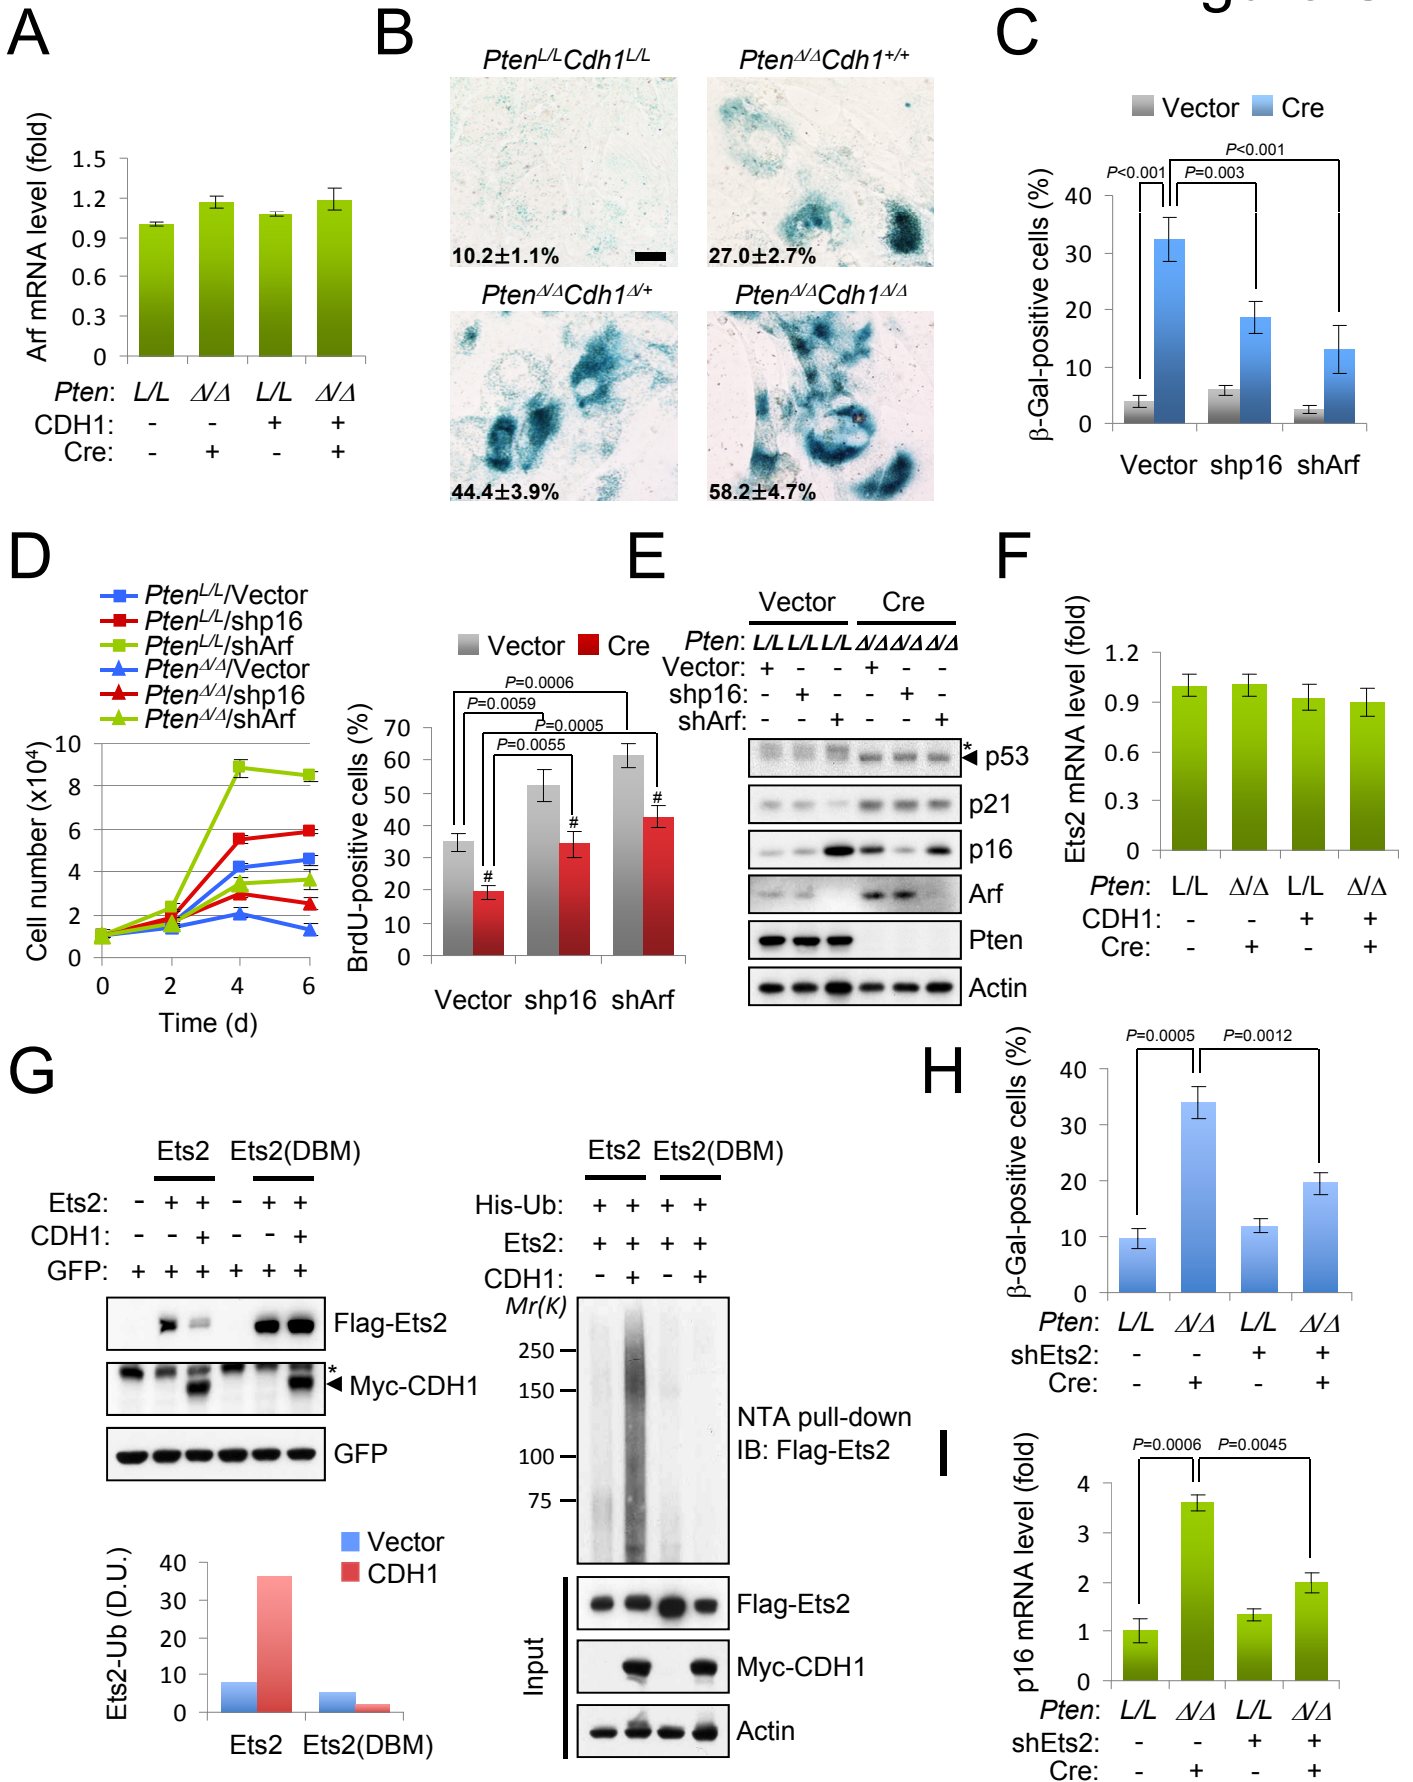

# Figure S5

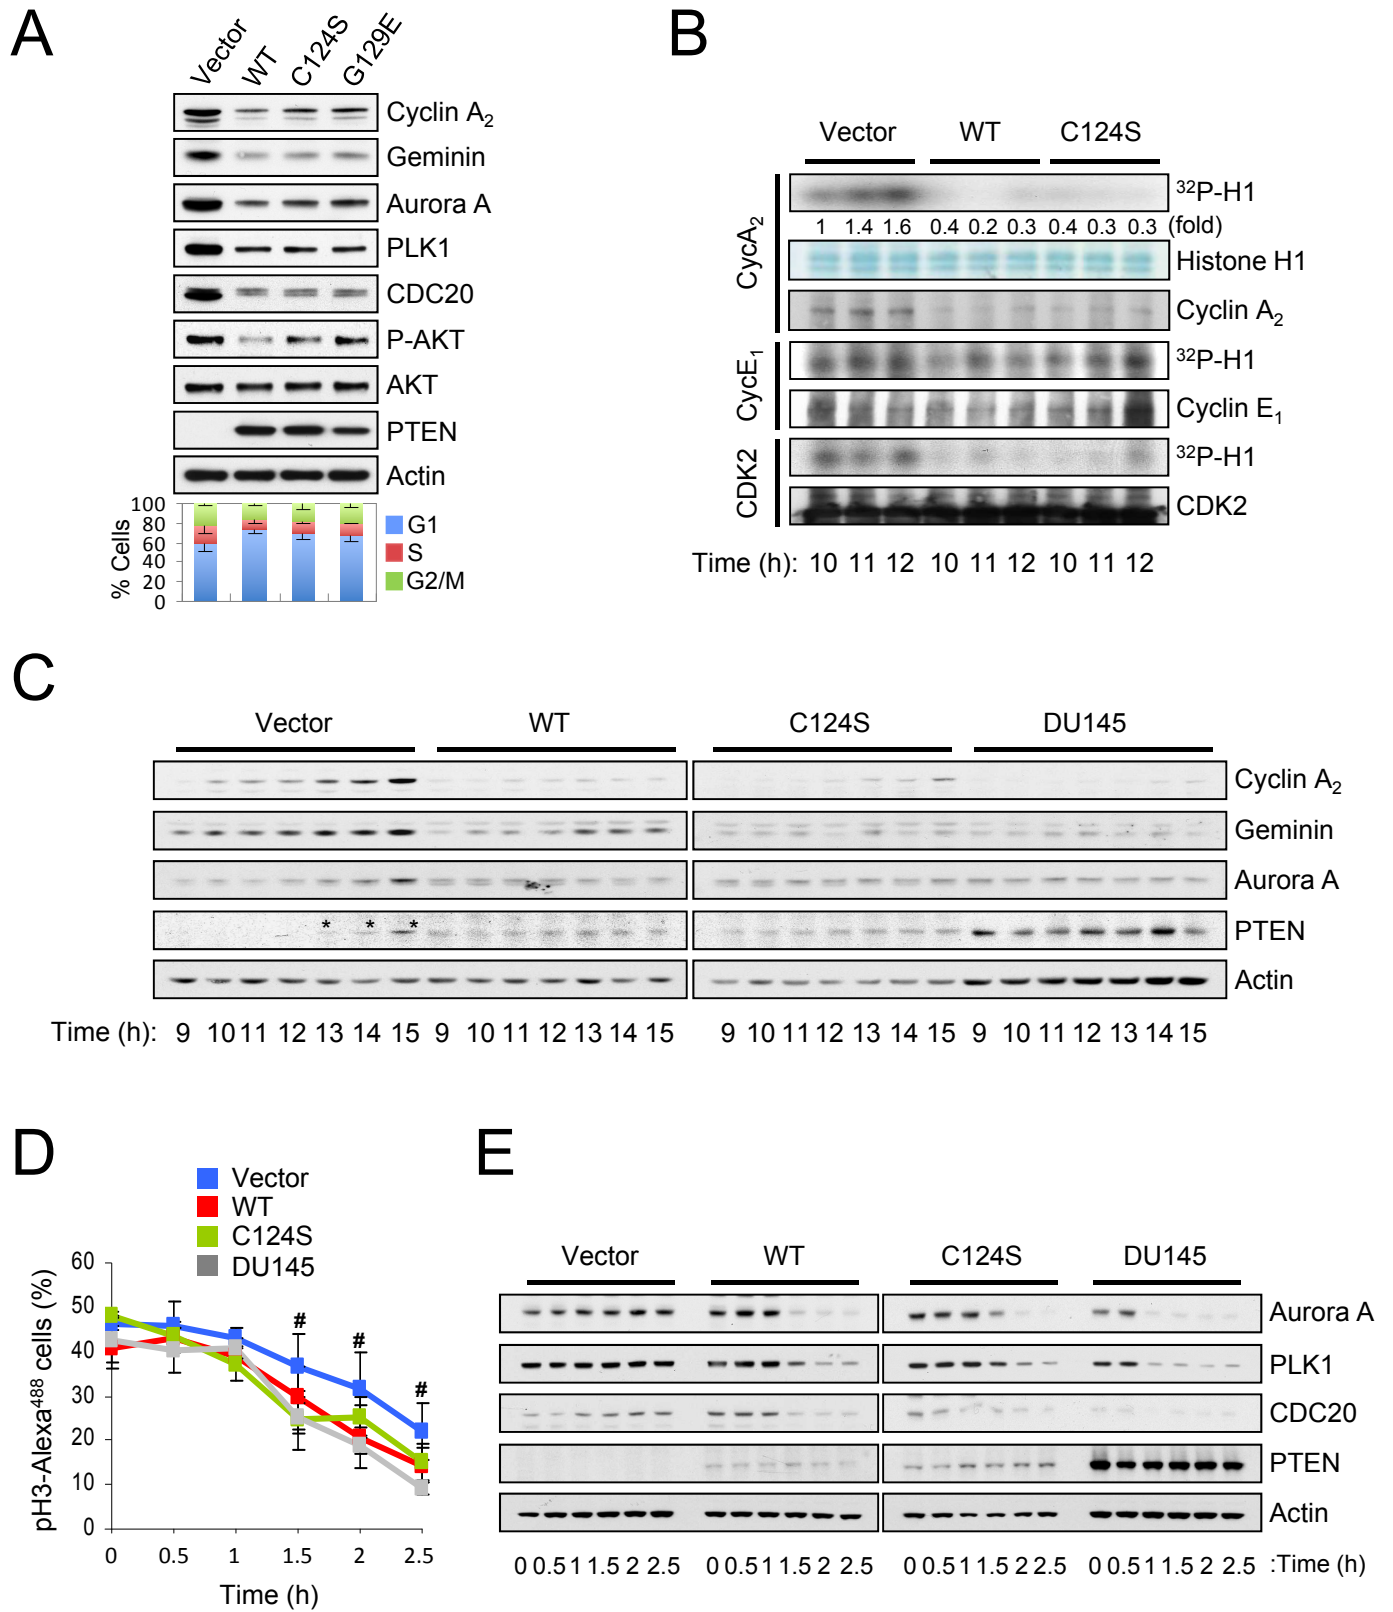

# Figure S6

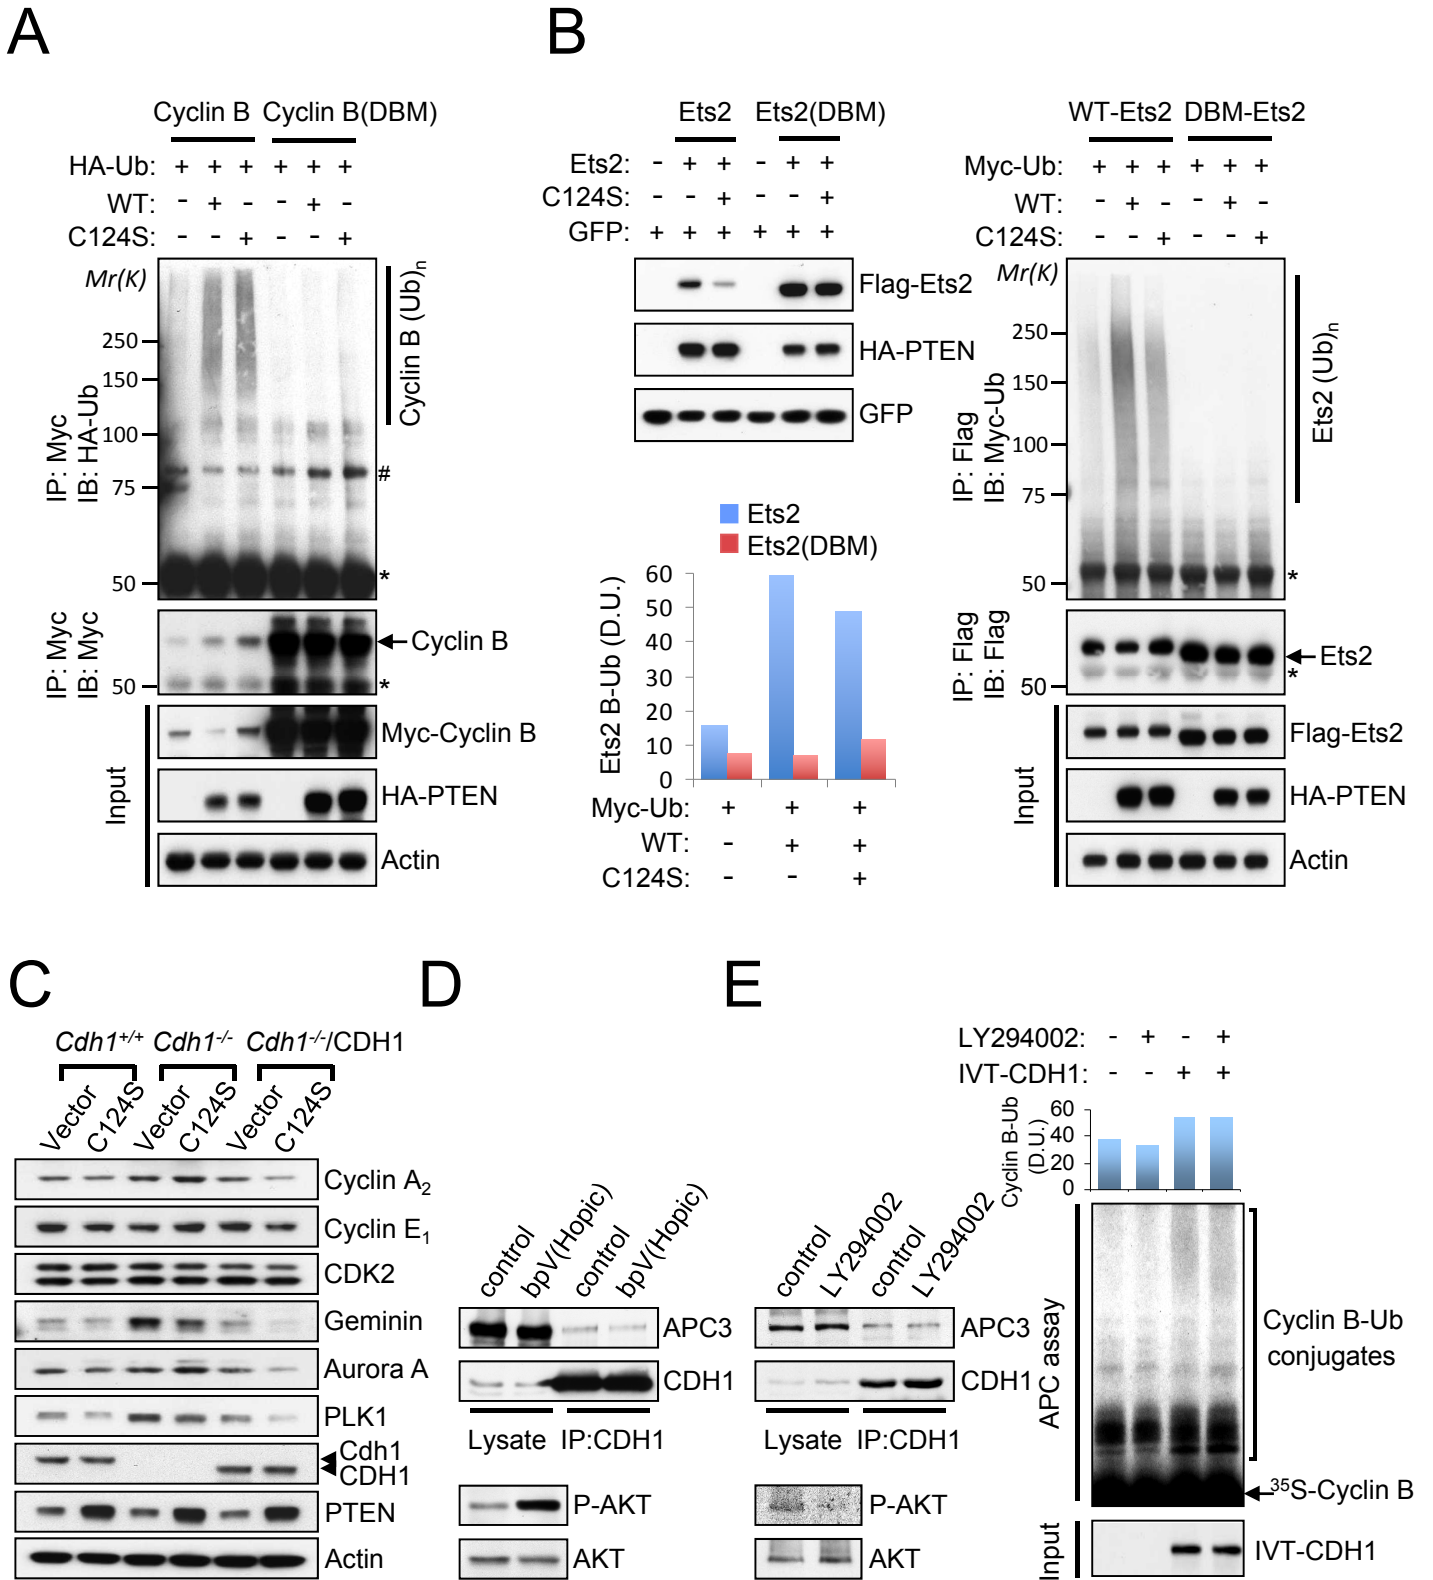



# Figure S7

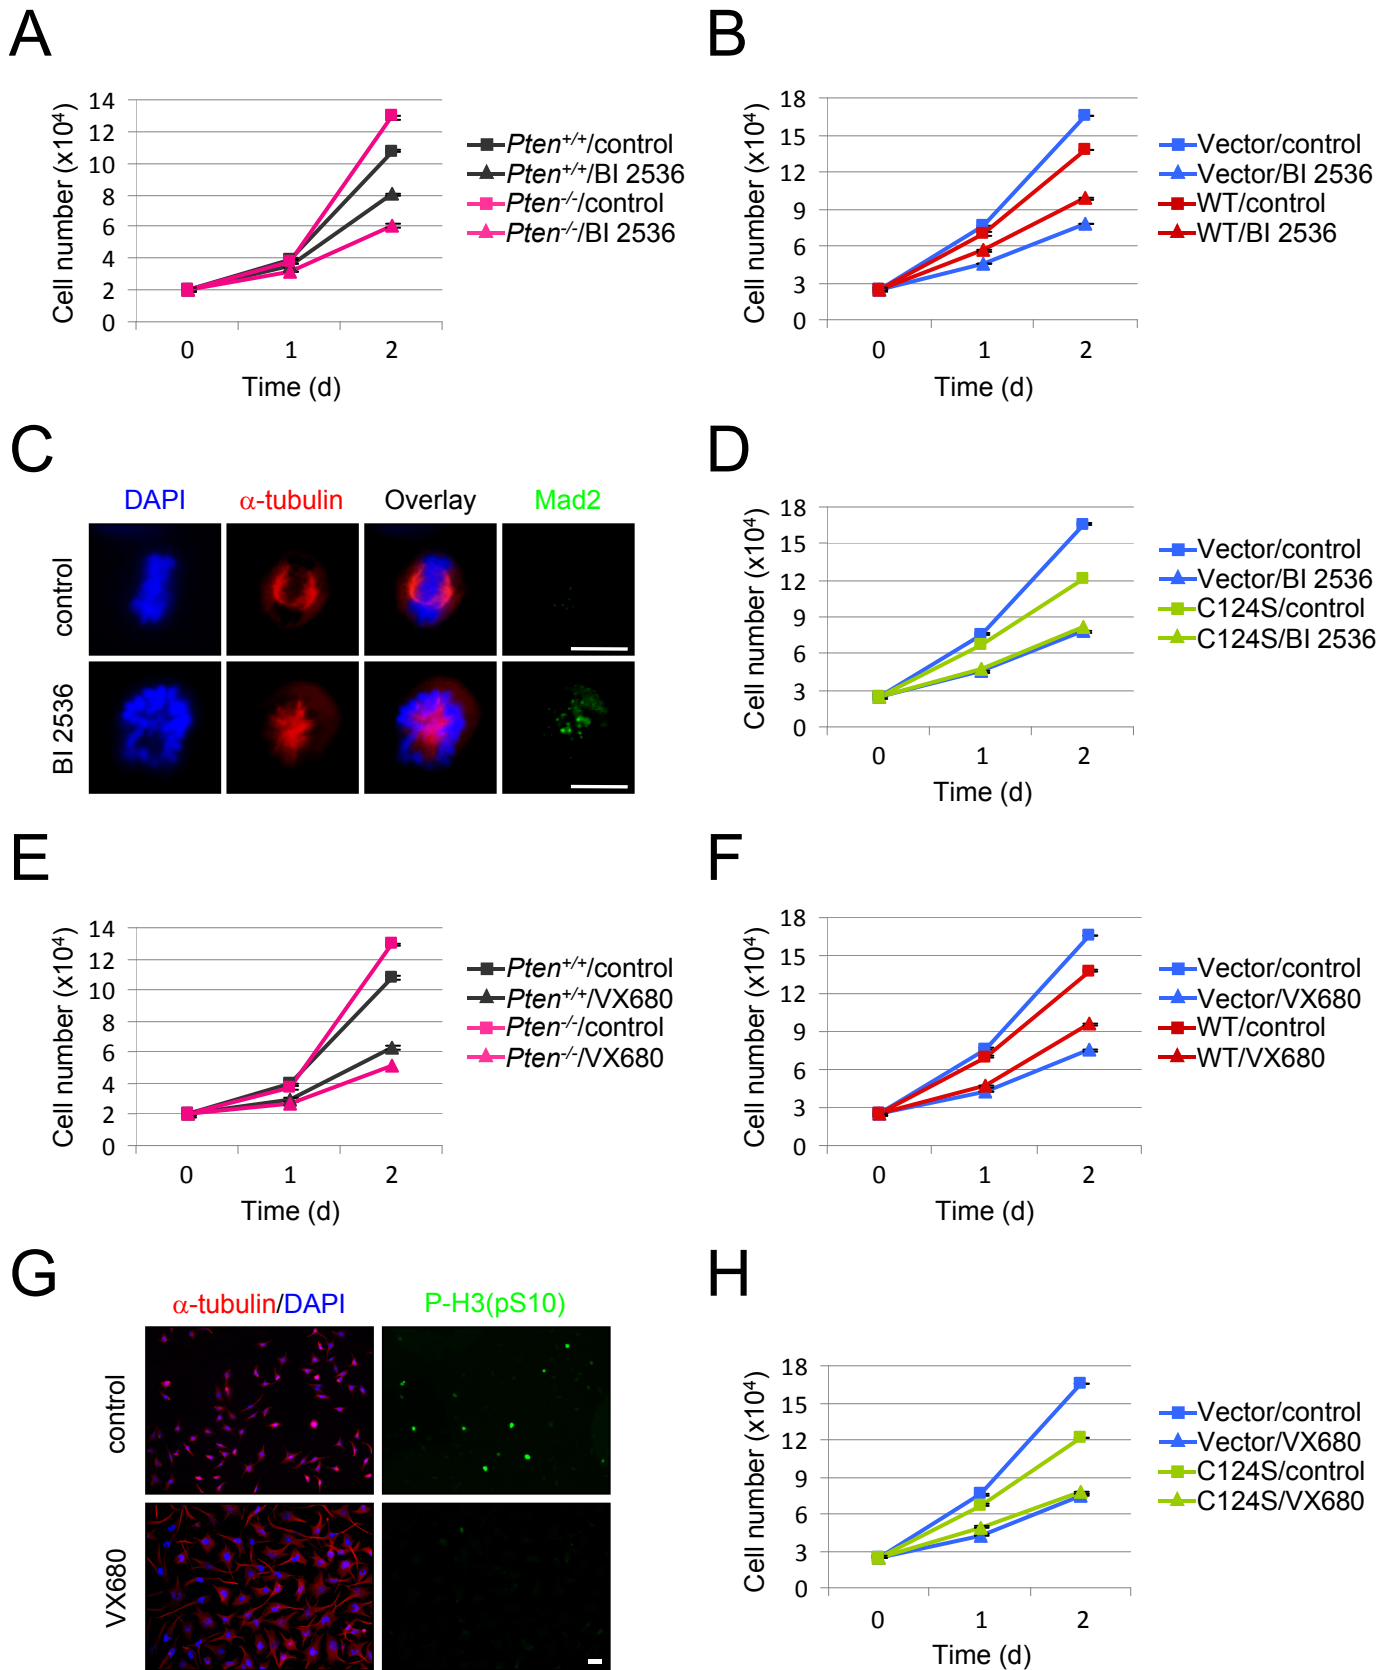

Supplement: NIHMS260688-supplement-02.pdf [file NIHMS260688-supplement-02.pdf]
